# Supplementary material for: Visualization of deformation-induced changes in carbon nanotube networks in rubber composites using lock-in thermography
Source: Royal Society of Chemistry journal article supplement (doi:10.1039/d3ra00717k), 2023-01-01
Supplement: d3ra00717k1.pdf [file d3ra00717k1.pdf]

## Supplemental Figure

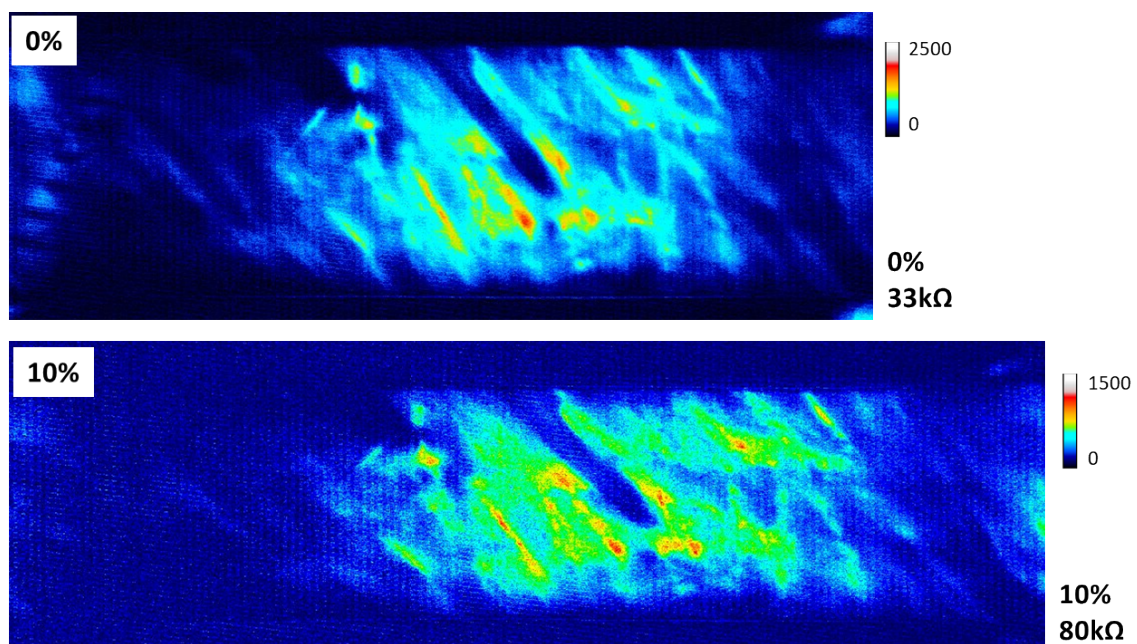

Fig. S1 LIT images of another CNT/FKM composite.
